# Supplementary material for: Investigation of post-depositional processing of nitrate in East Antarctic snow: isotopic constraints on photolytic loss, re-oxidation, and source inputs
Source: Copernicus journal article supplement (doi:10.5194/acp-15-9435-2015), 2015-08-24
Supplement: Supplementary file [file acp-15-9435-2015-supplement-title-page.pdf › acp-15-9435-2015-supplement-title-page.pdf]

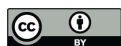

## *Supplement of*

# **Investigation of post-depositional processing of nitrate in East Antarctic snow: isotopic constraints on photolytic loss, re-oxidation, and source inputs**

**G. Shi et al.**

*Correspondence to:* M. G. Hastings ([meredith\\_hastings@brown.edu](mailto:meredith_hastings@brown.edu))

- [acp-15-9435-2015-supplement-title-page.pdf](#)
- Round 3-Supplement
  - [Round 3-Supplement.pdf](#)
  - [Snowpit data.txt](#)

The copyright of individual parts of the supplement might differ from the CC-BY 3.0 licence.
